# Supplementary material
Source: PubMed Central journal article supplement (PMC8313487)
Supplement: mmc2.pdf [file mmc2.pdf]

Supplementary Table 2. Summary of LOD preliminary range finding in pooled specimens using known concentrations of ATCC VR-1986HK whole inactivated virus spiked into individual negative saliva. The stock concentration provided by ATCC was  $4.2 \times 10^5$  GCE/ $\mu$ L. For each RNA extraction, 200 $\mu$ L of sample was used.

| Viral Conc                | Pool size | N         | Mean Ct (SD; N=3) |             |             |             |             | Result       | % Triggering Reflex |
|---------------------------|-----------|-----------|-------------------|-------------|-------------|-------------|-------------|--------------|---------------------|
|                           |           |           | Orf1ab            | N gene      | S gene      | MS2         | RP          |              |                     |
| 1250 GCE/ml (6.3 GCE/rxn) | 1         | 1         | 29.96(0.3)        | 28.37(0.34) | 24.94(4.28) | 28.67(1.06) | 23.29(0.45) | Positive     | 100%                |
|                           |           | 2         | 29.99(0.43)       | 28.51(1.44) | 25.75(5.33) | 28.11(0.47) | 23.04(0.04) | Positive     |                     |
|                           |           | 3         | 30.67(1.01)       | 28.86(2)    | 26.36(2.34) | 28.27(0.28) | 22.88(0.16) | Positive     |                     |
|                           | 8         | 1         | 32.83(0.62)       | 30.18(0.31) | 30.25(0.75) | 27.9(0.5)   | 23.19(0.08) | Positive     | 100%                |
|                           |           | 2         | 31.97(0.64)       | 30.4(0.1)   | 27.73(1.87) | 28.24(0.41) | 23.32(0.11) | Positive     |                     |
|                           |           | 3         | 32.36(1.18)       | 30.11(2.73) | 25.88(4.4)  | 28.51(0.4)  | 23.23(0.07) | Positive     |                     |
|                           | 16        | 1         | 33.37(0.6)        | 31.89(1.04) | 33.27(NA)   | 27.98(0.57) | 23.02(0.07) | Positive     | 100%                |
|                           |           | 2         | 32.28(NA)         | ND          | ND          | 28.4(0.93)  | 23.12(0.02) | Inconclusive |                     |
|                           |           | 3         | ND                | 31.38(NA)   | 28.46(NA)   | 28.9(0.59)  | 23.19(0.14) | Positive     |                     |
|                           | 24        | 1         | 32.65(1.13)       | 31.87(NA)   | 31.05(NA)   | 28.16(0.92) | 23(0.04)    | Positive     | 95.83%              |
|                           |           | 2         | 33.74(0.03)       | 30.8(NA)    | ND          | 28.54(0.86) | 23.08(0.04) | Positive     |                     |
|                           |           | 3         | 33.76(0.43)       | ND          | 30.01(0.9)  | 29.22(0.37) | 23.03(0.11) | Positive     |                     |
|                           |           | 4         | 31.29(NA)         | 30.5(NA)    | ND          | 27.23(0.97) | 22.72(0.05) | Positive     |                     |
|                           |           | 5         | 32.58(0.12)       | 32.47(NA)   | ND          | 27.04(0.7)  | 22.79(0.22) | Positive     |                     |
|                           |           | 6         | 32.96(0.6)        | ND          | 24.91(NA)   | 27.34(1.11) | 22.83(0.07) | Positive     |                     |
|                           |           | 7         | 33.76(NA)         | ND          | ND          | 27.63(0.3)  | 22.95(0.23) | Inconclusive |                     |
|                           |           | 8         | 30.88(NA)         | ND          | ND          | 27.79(0.77) | 23.17(0.13) | Inconclusive |                     |
|                           |           | 9         | 33.62(NA)         | 32.82(NA)   | 32.23(0.12) | 27.83(0.37) | 22.7(0.15)  | Positive     |                     |
|                           |           | 10        | 33.52(NA)         | 31.03(NA)   | ND          | 28.24(0.52) | 23.3(0.06)  | Positive     |                     |
|                           |           | 11        | 32.73(NA)         | ND          | 27.8(NA)    | 27.89(0.26) | 22.98(0.12) | Positive     |                     |
|                           |           | 12        | 33.31(1.73)       | 30.85(NA)   | 30.5(NA)    | 28.03(0.63) | 23.1(0.03)  | Positive     |                     |
|                           |           | 13        | 32.36(NA)         | 31.92(NA)   | ND          | 27.87(0.44) | 22.96(0.05) | Positive     |                     |
|                           |           | 14        | 32.53(NA)         | 31.87(0.29) | 30.92(NA)   | 28.24(0.09) | 23.09(0.13) | Positive     |                     |
|                           |           | 15        | 32.6(0.37)        | 31.34(1.44) | 27.65(3.36) | 27.81(0.22) | 22.8(0.18)  | Positive     |                     |
|                           |           | 16        | 32.54(NA)         | ND          | ND          | 28.37(0.57) | 23.05(0.02) | Inconclusive |                     |
|                           |           | 17        | ND                | ND          | 29.7(NA)    | 27.94(0.3)  | 23.14(0.1)  | Inconclusive |                     |
|                           |           | 18        | ND                | ND          | ND          | 28.21(0.67) | 23.05(0.03) | Negative     |                     |
|                           |           | 19        | 33.07(NA)         | ND          | 30.85(1.38) | 27.91(0.21) | 23.22(0.11) | Positive     |                     |
|                           |           | 20        | 32.86(NA)         | ND          | 32.46(NA)   | 27.79(0.65) | 23.31(0.14) | Positive     |                     |
|                           | 36        | 1         | 34.12(NA)         | 29.38(NA)   | ND          | 28.36(0.56) | 23.02(0.05) | Positive     | 100%                |
| 2                         |           | 33.87(NA) | 30.69(2.08)       | 25.13(NA)   | 28.6(0.73)  | 23.06(0.08) | Positive    |              |                     |
| 3                         |           | 33.56(NA) | 25.9(0.05)        | ND          | 28.13(1.09) | 22.95(0.04) | Positive    |              |                     |
| 48                        | 1         | 33.78(NA) | 31.32(NA)         | ND          | 28.05(0.76) | 23.1(0.04)  | Positive    | 66.67%       |                     |
|                           | 2         | ND        | 32.12(NA)         | 31.42(NA)   | 28.41(0.49) | 23.35(0.05) | Positive    |              |                     |
|                           | 3         | ND        | ND                | ND          | 27.86(1.17) | 23.09(0.05) | Negative    |              |                     |

|                                  |    |    |             |             |             |             |              |              |        |
|----------------------------------|----|----|-------------|-------------|-------------|-------------|--------------|--------------|--------|
| 625<br>GCE/ml<br>(3.1<br>GCE/rxn | 1  | 1  | 31.85(1.09) | 30.39(0.78) | 26.45(4.58) | 28.14(0.33) | 22.83(0.13)  | Positive     | 100%   |
|                                  |    | 2  | 30.96(0.69) | 29.31(0.73) | 26.05(6.23) | 28.25(0.44) | 22.99(0.05)  | Positive     |        |
|                                  |    | 3  | 31.22(0.89) | 29.51(0.46) | 27.27(2.12) | 28.49(0.57) | 23.02(0.04)  | Positive     |        |
|                                  | 8  | 1  | 33.47(NA)   | ND          | ND          | 28.55(0.58) | 23.16(0.05)  | Inconclusive | 100%   |
|                                  |    | 2  | 33.97(0.43) | 27.84(4.59) | 28.67(NA)   | 28.27(0.91) | 23.07(0.04)  | Positive     |        |
|                                  |    | 3  | 33.78(0.78) | 32.21(0.03) | 26.21(NA)   | 28.53(0.57) | 23.41(0.08)  | Positive     |        |
|                                  | 16 | 1  | 33.5(1.48)  | 30.87(NA)   | 25.5(NA)    | 28.56(0.66) | 22.99(0.04)  | Positive     | 66.67% |
|                                  |    | 2  | ND          | ND          | ND          | 28.61(0.81) | 22.92(0.04)  | Negative     |        |
|                                  |    | 3  | 34.1(NA)    | 31.41(NA)   | 30.14(1.09) | 28.37(1.01) | 22.97(0.1)   | Positive     |        |
|                                  | 24 | 1  | ND          | 31.2(0.75)  | 30.23(NA)   | 27.16(3.86) | 22.95(0.12)  | Positive     | 55.2%  |
|                                  |    | 2  | 34.43(NA)   | 27.44(NA)   | ND          | 28.95(0.73) | 22.98(0.09)  | Positive     |        |
|                                  |    | 3  | 34.66(NA)   | 31.67(NA)   | 29.8(NA)    | 28.67(1.02) | 22.85(0.07)  | Positive     |        |
|                                  |    | 4  | 33.76(NA)   | 28.58(4.84) | 29.71(0.39) | 27.7(1.42)  | 22.95(0.03)  | Positive     |        |
|                                  |    | 5  | ND          | ND          | ND          | 27.68(0.9)  | 22.83(0.1)   | Negative     |        |
|                                  |    | 6  | 33.33(NA)   | ND          | 30.21(NA)   | 28.19(0.49) | 22.82(0.08)  | Positive     |        |
|                                  |    | 7  | 33.5(NA)    | 30.48(NA)   | ND          | 27.74(0.42) | 22.62(0.21)  | Positive     |        |
|                                  |    | 8  | 33.38(NA)   | ND          | ND          | 26.87(2.66) | 22.92(0.02)  | Inconclusive |        |
|                                  |    | 9  | 32.37(NA)   | ND          | ND          | 27.85(0.38) | 22.76(0.2)   | Inconclusive |        |
|                                  |    | 10 | ND          | ND          | ND          | 27.49(0.44) | 23.78(0.06)  | Negative     |        |
|                                  |    | 11 | ND          | ND          | ND          | 27.79(0.49) | 23.86(0.13)  | Negative     |        |
|                                  |    | 12 | 33(NA)      | ND          | 33.03(NA)   | 26.81(0.38) | 22.58(0.16)  | Positive     |        |
|                                  |    | 13 | ND          | ND          | 32.58(NA)   | 26.75(0.33) | 22.4(0.08)   | Inconclusive |        |
|                                  |    | 14 | ND          | ND          | ND          | 27.9(0.38)  | 23.88(0.14)  | Negative     |        |
|                                  |    | 15 | ND          | ND          | ND          | 27.88(0.4)  | 23.9(0.13)   | Negative     |        |
|                                  |    | 16 | ND          | ND          | ND          | 26.93(0.4)  | 22.68(0.05)  | Negative     |        |
|                                  |    | 17 | 34.22(NA)   | ND          | ND          | 26.9(0.15)  | 22.7(0.08)   | Inconclusive |        |
|                                  |    | 18 | ND          | ND          | ND          | 27.06(0.42) | 23.55(0.03)  | Negative     |        |
|                                  |    | 19 | ND          | ND          | ND          | 26.69(0.49) | 23.35(0.01)  | Negative     |        |
|                                  |    | 20 | 34.71(NA)   | ND          | ND          | 26.88(0.57) | 23.16(0.19)  | Inconclusive |        |
|                                  |    | 21 | ND          | ND          | ND          | 26.91(0.6)  | 23.05(0.13)  | Negative     |        |
|                                  |    | 22 | ND          | ND          | ND          | 27.1(0.47)  | 23.34(0.03)  | Negative     |        |
|                                  |    | 23 | ND          | ND          | ND          | 26.81(0.58) | 23.01(0.25)  | Negative     |        |
|                                  |    | 24 | ND          | ND          | 32.76(NA)   | 26.71(0.54) | 23.09(0.13)  | Inconclusive |        |
|                                  |    | 25 | ND          | ND          | ND          | 26.57(0.85) | 22.96(0.17)  | Negative     |        |
|                                  |    | 26 | 35.05(NA)   | ND          | 32.5(0.22)  | 27.03(0.36) | 23.63(0.16)  | Positive     |        |
|                                  |    | 27 | 34.89(0.01) | ND          | ND          | 27.37(0.26) | 23.48(0.07)  | Inconclusive |        |
|                                  |    | 28 | ND          | ND          | ND          | 27.41(0.42) | 23.29(0.23)  | Negative     |        |
|                                  |    | 29 | ND          | 38.87(NA)   | 33.28(NA)   | 27.03(0.4)  | 23.19(0.09)  | Inconclusive |        |
|                                  | 36 | 1  | ND          | ND          | ND          | 27.85(1.52) | 22.93(0.09)  | Negative     | 33.33% |
|                                  |    | 2  | 34.02(0.19) | 31.54(1.1)  | 30.53(NA)   | 28.72(0.93) | 22.78(0.03)  | Positive     |        |
|                                  |    | 3  | ND          | ND          | ND          | 28.2(1.13)  | 22.86(0.08)  | Negative     |        |
|                                  | 48 | 1  | ND          | ND          | ND          | 27.74(1.64) | 22.84(0.02)  | Negative     | 33.33% |
| 2                                |    | ND | ND          | 31.42(NA)   | 27(3.69)    | 22.68(0.15) | Inconclusive |              |        |
| 3                                |    | ND | ND          | ND          | 26.56(3.15) | 22.75(0.06) | Negative     |              |        |

|                                   |    |   |             |             |             |             |             |              |        |
|-----------------------------------|----|---|-------------|-------------|-------------|-------------|-------------|--------------|--------|
| 313<br>GCE/ml<br>(1.6<br>GCE/rxn) | 1  | 1 | 31.71(1.12) | 31.9(0.04)  | 28.74(0.41) | 28.18(0.22) | 22.88(0.12) | Positive     | 100%   |
|                                   |    | 2 | 32.13(0.75) | 30.57(0.77) | 26.95(0.1)  | 28.36(0.2)  | 22.97(0.04) | Positive     |        |
|                                   |    | 3 | 32.39(1.83) | 29.78(1.37) | 26.52(2.99) | 28.19(0.61) | 23.31(0.11) | Positive     |        |
|                                   | 8  | 1 | ND          | 30.62(2.75) | 29.98(NA)   | 27.91(1.12) | 23.16(0.02) | Positive     | 100%   |
|                                   |    | 2 | 33.11(1.73) | 31.26(0.01) | 28.51(NA)   | 28.19(0.72) | 23.23(0.14) | Positive     |        |
|                                   |    | 3 | 32.9(1.11)  | 29.8(2.68)  | ND          | 27.92(1.37) | 23.29(0.06) | Positive     |        |
|                                   | 16 | 1 | ND          | ND          | 31.21(NA)   | 28.7(0.64)  | 23.18(0.04) | Inconclusive | 100%   |
|                                   |    | 2 | 33.8(0.71)  | ND          | ND          | 27.33(1.92) | 22.96(0.02) | Inconclusive |        |
|                                   |    | 3 | 31.81(NA)   | 31.91(NA)   | ND          | 28.09(1.35) | 23.05(0.03) | Positive     |        |
|                                   | 24 | 1 | ND          | ND          | ND          | 25.95(5.11) | 22.88(0.08) | Negative     | 0%     |
|                                   |    | 2 | ND          | ND          | ND          | 26.7(3.7)   | 22.81(0.05) | Negative     |        |
|                                   |    | 3 | ND          | ND          | ND          | 28.01(1.02) | 22.81(0.11) | Negative     |        |
|                                   | 36 | 1 | ND          | ND          | ND          | 25.96(5.06) | 22.99(0.14) | Negative     | 0%     |
|                                   |    | 2 | ND          | ND          | ND          | 27.34(2.41) | 22.66(0.09) | Negative     |        |
|                                   |    | 3 | ND          | ND          | ND          | 26.42(3.76) | 22.81(0.12) | Negative     |        |
|                                   | 48 | 1 | 33.73(NA)   | ND          | ND          | 28.17(0.44) | 22.77(0.21) | Inconclusive | 33.33% |
|                                   |    | 2 | ND          | ND          | ND          | 27.34(0.89) | 22.6(0.14)  | Negative     |        |
|                                   |    | 3 | ND          | ND          | ND          | 28.04(0.67) | 22.77(0.07) | Negative     |        |
| 78<br>GCE/ml<br>(0.8<br>GCE/rxn)  | 1  | 1 | 33.46(1.1)  | 30.4(NA)    | 29.14(NA)   | 28.57(0.31) | 23.53(0.06) | Positive     | 100%   |
|                                   |    | 2 | 33.52(1.36) | 29.61(0.98) | 27.78(6.33) | 28.05(0.58) | 23.29(0.22) | Positive     |        |
|                                   |    | 3 | 31.4(2.4)   | 31.48(0.39) | 29.58(2.25) | 28.33(0.28) | 23.41(0.07) | Positive     |        |
|                                   | 8  | 1 | ND          | 32.76(NA)   | ND          | 28.65(0.9)  | 23.66(0.06) | Inconclusive | 100%   |
|                                   |    | 2 | 33.34(1.08) | ND          | ND          | 28.73(0.44) | 23.57(0.1)  | Inconclusive |        |
|                                   |    | 3 | 34.02(NA)   | ND          | 29.64(NA)   | 28.15(0.39) | 23.36(0.17) | Positive     |        |
|                                   | 16 | 1 | 29.76(NA)   | ND          | ND          | 25.9(5.48)  | 23.17(0.1)  | Inconclusive | 66.67% |
|                                   |    | 2 | 32.4(1.9)   | ND          | ND          | 28.69(1.11) | 23.44(0.07) | Inconclusive |        |
|                                   |    | 3 | ND          | ND          | ND          | 28.25(0.46) | 23.35(0.04) | Negative     |        |
|                                   | 24 | 1 | ND          | ND          | ND          | 28.37(1.62) | 22.93(0.17) | Negative     | 0%     |
|                                   |    | 2 | ND          | ND          | ND          | 28.89(1.04) | 23.15(0.16) | Negative     |        |
|                                   |    | 3 | ND          | ND          | ND          | 28.4(0.43)  | 23.29(0.14) | Negative     |        |
|                                   | 36 | 1 | ND          | ND          | ND          | 28.53(1.34) | 23.11(0.05) | Negative     | 0%     |
|                                   |    | 2 | ND          | ND          | ND          | 28.88(0.44) | 23(0.11)    | Negative     |        |
|                                   |    | 3 | ND          | ND          | ND          | 28.82(0.23) | 23.31(0.1)  | Negative     |        |
|                                   | 48 | 1 | ND          | ND          | ND          | 28.62(0.72) | 23.07(0.05) | Negative     | 0%     |
|                                   |    | 2 | ND          | ND          | ND          | 28.75(0.48) | 23.29(0.08) | Negative     |        |
|                                   |    | 3 | ND          | ND          | ND          | 28.1(0.28)  | 23.18(0.06) | Negative     |        |

ND – not detected.

N – replicate number.
